# Supplementary material for: General practitioners’ perceptions of using virtual primary care during the COVID-19 pandemic: An international cross-sectional survey study
Source: PubMed Central journal article supplement (PMC9931239; doi:10.1371/journal.pdig.0000029), 2022-05-16
Supplement: pdig.0000029.s001.pdf [file pdig.0000029.s001.pdf]

## Block 1

### Participant Information

You are being invited to take part in a survey to help us better understand the use of digital-first models to deliver care across various international healthcare settings. The aim of this survey is to explore the international impact of COVID-19 on digital-first models in primary care. *Digital-first models are defined as contacts with healthcare that happen firstly by an online means (i.e. telephone, video, website,... ) as opposed to the traditional face-to-face care.*

In this research study we will use information provided by you. Everyone involved in this study will keep your data safe and secure. We will also follow all privacy rules. At the end of the study we will save some of the data in case we need to check it and/or for future research. We will make sure no one can work out who you are from the reports we write.

The Participant Information Sheet tells you more about this, to view a copy of it please click [here](#).

The survey will take approximately 15 minutes to complete. You can save your responses and come back to them later if you need to.

If you have any questions, please do feel free to contact the Principal Investigator of the study, Dr Ana Luisa Neves ([ana.luisa.neves14@imperial.ac.uk](mailto:ana.luisa.neves14@imperial.ac.uk)).

- I confirm that I have read and understand the Participant Information Sheet (version 1.2 dated 28.05.2020) for the above study and have had the opportunity to ask questions which have been answered fully.
- I understand that my participation is voluntary, and I am free to withdraw at any time, without giving any reason and without my legal rights being affected.
- I consent to take part in this survey

### Default Question Block

## **PART I: Participant and practice information**

In this section, we aim to learn more about you and your clinical experience as a primary care physician. We aim to learn more about your practice, as well as your current use of digital technologies.

### **1A. Please select your gender**

- Female
- Male
- Other
- Prefer not to answer

### **1B. Please select your age from the categories below:**

- Under 30
- 30-39
- 40-49
- 50-59
- 60-69
- 70+
- Prefer not to answer

### **1C. For how long have you been working as a General Practitioner/Family Doctor?**

- < 5 years
- 5 - 10 years
- 10 - 15 years
- 15 - 20 years
- > 20 years

### **1D. On average, how many hours of clinical work do you have per week?**

### **1E. Are you involved in teaching activities? (i.e. teaching trainees or medical students, or affiliated to a university)**

- Yes
- No
- Prefer not to answer

**1F In which country do you currently practice?**

**1G. In which type of setting is your practice located?**

- Urban
- Rural
- Mixed

**1H. In your practice, do you have access to electronic health records?**

- Yes
- No

**1I. For how long have you been using an electronic health record in your practice?**

- Only after COVID-19 outbreak
- Before COVID-19 outbreak, but for less than 2 years
- 2-5 years
- 5-10 years
- More than 10 years

**1J. How often do you personally access electronic health records in your practice?**

- Less than once a month
- At least once a month
- At least once a week
- More than once a week
- Everyday

**1K. Please tell us if your electronic health record system has any of the following core functions?**

|                                                                                                                                                                                        | Yes                   | Partially             | No                    |
|----------------------------------------------------------------------------------------------------------------------------------------------------------------------------------------|-----------------------|-----------------------|-----------------------|
| Accessing to new and past test results by providers in multiple settings                                                                                                               | <input type="radio"/> | <input type="radio"/> | <input type="radio"/> |
| Entering and storing orders for prescriptions, tests, and other services                                                                                                               | <input type="radio"/> | <input type="radio"/> | <input type="radio"/> |
| Reminders, prompts, alerts, and computerized decision-support systems (eg. screenings and other preventive practices, identify drug interactions, facilitate diagnoses and treatments) | <input type="radio"/> | <input type="radio"/> | <input type="radio"/> |
| Efficient, secure, and readily accessible communication among providers                                                                                                                | <input type="radio"/> | <input type="radio"/> | <input type="radio"/> |
| Efficient, secure, and readily accessible communication between providers and patients                                                                                                 | <input type="radio"/> | <input type="radio"/> | <input type="radio"/> |
| Tools that give patients access to their health records                                                                                                                                | <input type="radio"/> | <input type="radio"/> | <input type="radio"/> |
| Tools that provide interactive patient education                                                                                                                                       | <input type="radio"/> | <input type="radio"/> | <input type="radio"/> |
| Tools to carry out home monitoring and self-testing of chronic conditions (eg. diabetes)                                                                                               | <input type="radio"/> | <input type="radio"/> | <input type="radio"/> |
| Computerised administrative tools, such as scheduling systems                                                                                                                          | <input type="radio"/> | <input type="radio"/> | <input type="radio"/> |
| Stores electronic data in a standardised way to quickly generate reports                                                                                                               | <input type="radio"/> | <input type="radio"/> | <input type="radio"/> |

**1L. In order to help us understand the digital maturity of your electronic health record system, please tell us how much you agree with the following statements.**

|                                                                                            | Agree                 | Neutral               | Disagree              |
|--------------------------------------------------------------------------------------------|-----------------------|-----------------------|-----------------------|
| Most healthcare providers in our practice use the digital system                           | <input type="radio"/> | <input type="radio"/> | <input type="radio"/> |
| Our organisation is ready to use the digital system correctly                              | <input type="radio"/> | <input type="radio"/> | <input type="radio"/> |
| We have the individual abilities needed to use the digital system correctly                | <input type="radio"/> | <input type="radio"/> | <input type="radio"/> |
| Our digital system has the capability to communicate across services or with other systems | <input type="radio"/> | <input type="radio"/> | <input type="radio"/> |

|                                                                                                   | Agree                 | Neutral               | Disagree              |
|---------------------------------------------------------------------------------------------------|-----------------------|-----------------------|-----------------------|
| We have best practice digital maturity evaluation methods in place                                | <input type="radio"/> | <input type="radio"/> | <input type="radio"/> |
| Our system has a positive impact in terms of outcomes for patients, structure, process or finance | <input type="radio"/> | <input type="radio"/> | <input type="radio"/> |

### 1M. How do using electronic health records impact the following aspects of your practice?

|                                                                                                                                    | Positive impact       | No change             | Negative impact       |
|------------------------------------------------------------------------------------------------------------------------------------|-----------------------|-----------------------|-----------------------|
| Avoiding harm to patients from the care that is intended to help them.                                                             | <input type="radio"/> | <input type="radio"/> | <input type="radio"/> |
| Respecting and responding to individual patient preferences, needs, and values                                                     | <input type="radio"/> | <input type="radio"/> | <input type="radio"/> |
| Providing services based in scientific knowledge to those who could benefit and refraining services to those not likely to benefit | <input type="radio"/> | <input type="radio"/> | <input type="radio"/> |
| Avoiding waste of human and financial resources, equipment or supplies                                                             | <input type="radio"/> | <input type="radio"/> | <input type="radio"/> |
| Reducing waits and delays in delivery of care                                                                                      | <input type="radio"/> | <input type="radio"/> | <input type="radio"/> |
| Providing care that does not vary in quality because of the patient personal characteristics                                       | <input type="radio"/> | <input type="radio"/> | <input type="radio"/> |

## Block 2

### **PART II: Use of digital-first models BEFORE and DURING the COVID-19 pandemic**

On **11th March**, the World Health Organisation (WHO) declared the novel coronavirus (COVID-19) outbreak a global pandemic.

In this section, we will explore your experience using digital-first models (i.e. video and telephone consultations, remote monitoring, ...) BEFORE and DURING the COVID-19 pandemic, as well as any training and guidance you might have received.

**2A. Please select which technologies were available in your practice, before and during the COVID-19 pandemic (from 11th March).**

*Please select all which apply to these statements*

|                                                                                                                                   | Available BEFORE the COVID-19 pandemic | Available DURING the COVID-19 pandemic | Not available            |
|-----------------------------------------------------------------------------------------------------------------------------------|----------------------------------------|----------------------------------------|--------------------------|
| Remote access to patients' records from home                                                                                      | <input type="checkbox"/>               | <input type="checkbox"/>               | <input type="checkbox"/> |
| Telephone consultations                                                                                                           | <input type="checkbox"/>               | <input type="checkbox"/>               | <input type="checkbox"/> |
| Chat consultations (ie. using a messaging system)                                                                                 | <input type="checkbox"/>               | <input type="checkbox"/>               | <input type="checkbox"/> |
| Video consultations                                                                                                               | <input type="checkbox"/>               | <input type="checkbox"/>               | <input type="checkbox"/> |
| Online triage (e.g. telephone, video)                                                                                             | <input type="checkbox"/>               | <input type="checkbox"/>               | <input type="checkbox"/> |
| Remote clinical monitoring technologies                                                                                           | <input type="checkbox"/>               | <input type="checkbox"/>               | <input type="checkbox"/> |
| Patient-initiated digital services (ie. scheduling, health education activities, prescription renewal, test requests, sick leave) | <input type="checkbox"/>               | <input type="checkbox"/>               | <input type="checkbox"/> |
| Secure messaging systems (ie. to communicate results to patients)                                                                 | <input type="checkbox"/>               | <input type="checkbox"/>               | <input type="checkbox"/> |
| Other (please specify below):<br><div style="border: 1px solid black; height: 20px; width: 100%; margin-top: 5px;"></div>         | <input type="checkbox"/>               | <input type="checkbox"/>               | <input type="checkbox"/> |

**2B. On average, how many hours per week did you usually spend in the following clinical activities?**

*Please enter a number for BEFORE and DURING and put 0 for technologies that were not available at that time*

|                                                   | BEFORE the COVID-19 pandemic | DURING the COVID-19 pandemic |
|---------------------------------------------------|------------------------------|------------------------------|
| Remote access to patients' records from home      | <input type="text"/>         | <input type="text"/>         |
| Telephone consultations                           | <input type="text"/>         | <input type="text"/>         |
| Chat consultations (ie. using a messaging system) | <input type="text"/>         | <input type="text"/>         |
| Video consultations                               | <input type="text"/>         | <input type="text"/>         |
| Online triage (e.g. telephone, video)             | <input type="text"/>         | <input type="text"/>         |
| Remote clinical monitoring technologies           | <input type="text"/>         | <input type="text"/>         |

BEFORE the COVID-19 pandemic

DURING the COVID-19 pandemic

Patient-initiated digital services (ie. scheduling, health education activities, prescription renewal, test requests, sick leave)

Secure messaging systems (ie. to communicate results to patients)

## 2C. Concerning training and guidance in digital-first technologies:

*Please select all which apply to these statements; if not applicable please leave blank.*

*Digital-first models are defined as contacts with healthcare that happen firstly by an online means (i.e. telephone, video, website,... ) as opposed to the traditional face-to-face care.*

Yes, BEFORE the COVID-19 pandemic

Yes, DURING the COVID-19 pandemic

Were you offered any training on digital-first technologies?

Did you undertake any training on digital-first technologies?

Are you aware of any local guidance advising the use of digital-first solutions?

Are you aware of any national guidance advising the use of digital-first solutions?

Were you aware of any guidance around cybersecurity and the use of digital-first technologies in healthcare?

Was there any specific guidance or training for family medicine / general practice trainees?

## 2D. I recommended the following digital health support solutions to my patients:

*Please select all which apply to these statements - if not recommended, please leave blank.*

Yes, BEFORE the COVID-19 pandemic

Yes, DURING the COVID-19 pandemic

Symptom checker/self-assessment tool

Online information resources

Health trackers (e.g. FitBit, AppleHealth)

Yes, BEFORE the COVID-19 pandemic

Yes, DURING the COVID-19 pandemic

Mindfulness apps/websites  
(e.g. The Mindfulness App,  
Headspace, Calm)



Online counselling services  
(e.g. BetterHealth, e-  
Therapy)



Online crisis resolution  
services (e.g. Shout)



**Block 3**

**PART III: Experience and impact of using digital-first models DURING the COVID-19 outbreak**

In this section, we will explore your experience and perceived impact of using digital-first models DURING the COVID-19 outbreak.

**3A. How was your overall experience using digital-first technologies in the context of the COVID-19 pandemic?**

Very  Good

Good

Neither  Good nor Bad

Bad

Very  Bad

**3B. In the context of the COVID-19 pandemic, how have each one of these technologies impacted patient care?**

Positive impact

No change

Negative impact

Remote access to patients' records from home




Telephone consultations




Chat consultations (ie. using a messaging system)




Video consultations




Online triage (e.g. telephone, video)




Remote clinical monitoring technologies



|                                                                                                                                   | Positive impact       | No change             | Negative impact       |
|-----------------------------------------------------------------------------------------------------------------------------------|-----------------------|-----------------------|-----------------------|
| Patient-initiated digital services (ie. scheduling, health education activities, prescription renewal, test requests, sick leave) | <input type="radio"/> | <input type="radio"/> | <input type="radio"/> |
| Secure messaging systems (ie. to communicate results to patients)                                                                 | <input type="radio"/> | <input type="radio"/> | <input type="radio"/> |

**3C. In the context of the COVID-19 pandemic, how have digital-first technologies overall impacted your clinical practice?**

|                                                                        | Positive impact       | No change             | Negative impact       |
|------------------------------------------------------------------------|-----------------------|-----------------------|-----------------------|
| Reduction of the risk of transmission of COVID-19                      | <input type="radio"/> | <input type="radio"/> | <input type="radio"/> |
| Monitoring infected patients                                           | <input type="radio"/> | <input type="radio"/> | <input type="radio"/> |
| Remote delivery of preventive care                                     | <input type="radio"/> | <input type="radio"/> | <input type="radio"/> |
| Management of patients with chronic conditions                         | <input type="radio"/> | <input type="radio"/> | <input type="radio"/> |
| Remote delivery of acute care (ie. minor illnesses in primary care)    | <input type="radio"/> | <input type="radio"/> | <input type="radio"/> |
| Communication and supporting the patient-doctor relationship           | <input type="radio"/> | <input type="radio"/> | <input type="radio"/> |
| Communication between healthcare providers                             | <input type="radio"/> | <input type="radio"/> | <input type="radio"/> |
| Ability to gauge patients' emotional wellbeing                         | <input type="radio"/> | <input type="radio"/> | <input type="radio"/> |
| Patient satisfaction                                                   | <input type="radio"/> | <input type="radio"/> | <input type="radio"/> |
| Waiting lists and harmful delays in delivery of care                   | <input type="radio"/> | <input type="radio"/> | <input type="radio"/> |
| Gauging if patients require more input regarding care delivery         | <input type="radio"/> | <input type="radio"/> | <input type="radio"/> |
| Identifying patients that need escalation in care                      | <input type="radio"/> | <input type="radio"/> | <input type="radio"/> |
| Providing equitable care for all                                       | <input type="radio"/> | <input type="radio"/> | <input type="radio"/> |
| Avoiding waste of human and financial resources, equipment or supplies | <input type="radio"/> | <input type="radio"/> | <input type="radio"/> |

**3D. In your opinion, which were the biggest benefits of using digital technologies during the COVID-19 pandemic??**

**3E. In your opinion, which were the biggest challenges (i.e. problems an unintended harms) of using digital technologies during the COVID-19 pandemic? How did you overcome them?**

**Block 4**

**PART IV: Future of Digital-first Models in Primary Care**

In this section, we will explore how the use of digital-first models during the COVID-19 pandemic can reshape the delivery of primary care, lessons learned and the way forward.

**4A. After the COVID-19 outbreak, how would you LIKE the adoption of these tools to evolve in the future?**

|                                                   | Higher adoption than before<br>COVID-19 | Return to pre-COVID-19<br>adoption levels | Lower adoption than before<br>COVID-19 |
|---------------------------------------------------|-----------------------------------------|-------------------------------------------|----------------------------------------|
| Remote access to patients' records from home      | <input type="radio"/>                   | <input type="radio"/>                     | <input type="radio"/>                  |
| Telephone consultations                           | <input type="radio"/>                   | <input type="radio"/>                     | <input type="radio"/>                  |
| Chat consultations (ie. using a messaging system) | <input type="radio"/>                   | <input type="radio"/>                     | <input type="radio"/>                  |
| Video consultations                               | <input type="radio"/>                   | <input type="radio"/>                     | <input type="radio"/>                  |
| Online triage (e.g. telephone, video)             | <input type="radio"/>                   | <input type="radio"/>                     | <input type="radio"/>                  |

|                                                                                                                                          | Higher adoption than before<br>COVID-19 | Return to pre-COVID-19<br>adoption levels | Lower adoption than before<br>COVID-19 |
|------------------------------------------------------------------------------------------------------------------------------------------|-----------------------------------------|-------------------------------------------|----------------------------------------|
| Remote clinical monitoring technologies                                                                                                  | <input type="radio"/>                   | <input type="radio"/>                     | <input type="radio"/>                  |
| Patient-initiated digital services (ie. scheduling, health education activities, prescription renewal, test requests, sick leave)        | <input type="radio"/>                   | <input type="radio"/>                     | <input type="radio"/>                  |
| Secure messaging systems (ie. to communicate results to patients)                                                                        | <input type="radio"/>                   | <input type="radio"/>                     | <input type="radio"/>                  |
| Any other technology (please specify below):<br><div style="border: 1px solid black; height: 30px; width: 100%; margin-top: 5px;"></div> | <input type="radio"/>                   | <input type="radio"/>                     | <input type="radio"/>                  |

**4B. Can you list three main barriers that could lead to a return to pre-COVID-19 adoption levels or lower?**

**4C. After the outbreak is resolved, which are the TOP THREE aspects that are important to ensure a high-quality adoption of digital-first technologies in the future?**

- |                                                                                                                                   |                                                                                          |
|-----------------------------------------------------------------------------------------------------------------------------------|------------------------------------------------------------------------------------------|
| <input type="checkbox"/> Producing strong evidence of a positive impact of digital-first technologies                             | <input type="checkbox"/> Ensuring patient safety and privacy are protected               |
| <input type="checkbox"/> Involving healthcare professionals and patients on the design and maintenance of digital-first solutions | <input type="checkbox"/> Guaranteeing interoperability between different systems         |
| <input type="checkbox"/> Improving usability for the end-users (i.e. healthcare professionals and patients)                       | <input type="checkbox"/> Improve technical infrastructure (i.e. hardware)                |
| <input type="checkbox"/> Providing digital training and support                                                                   | <input type="checkbox"/> Increasing investment on digital-first technologies             |
| <input type="checkbox"/> Producing clear guidelines and regulations                                                               | <input type="checkbox"/> Other (please specify below)                                    |
|                                                                                                                                   | <div style="border: 1px solid black; height: 30px; width: 100%; margin-top: 5px;"></div> |
